# Supplementary material
Source: PubMed Central journal article supplement (PMC1986617)

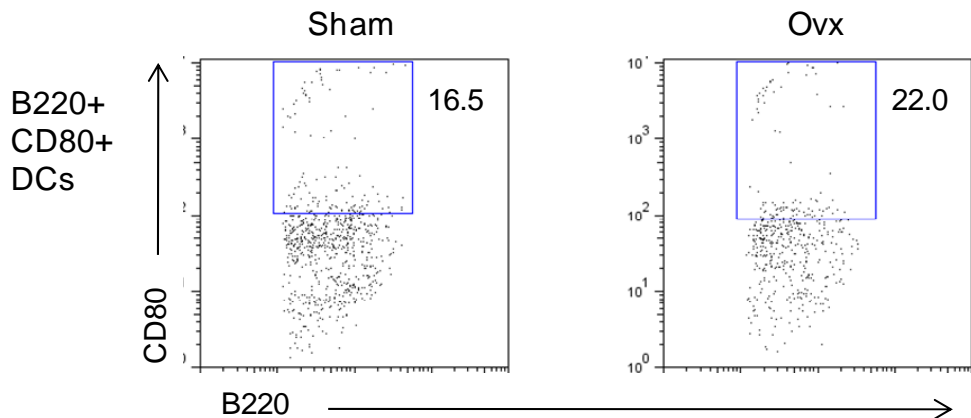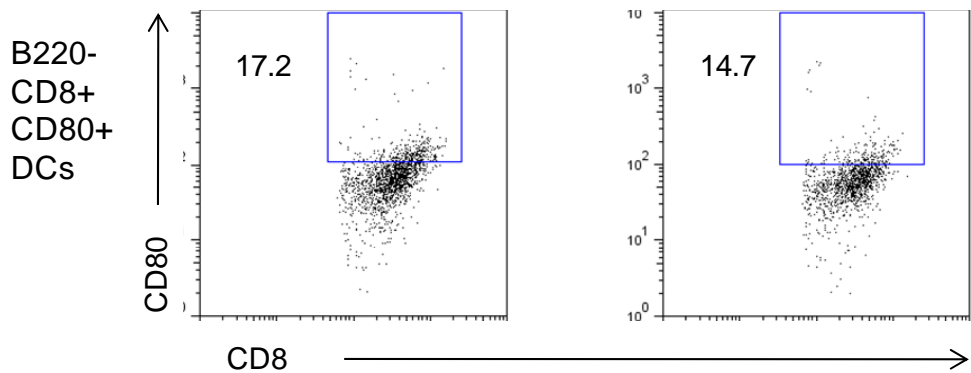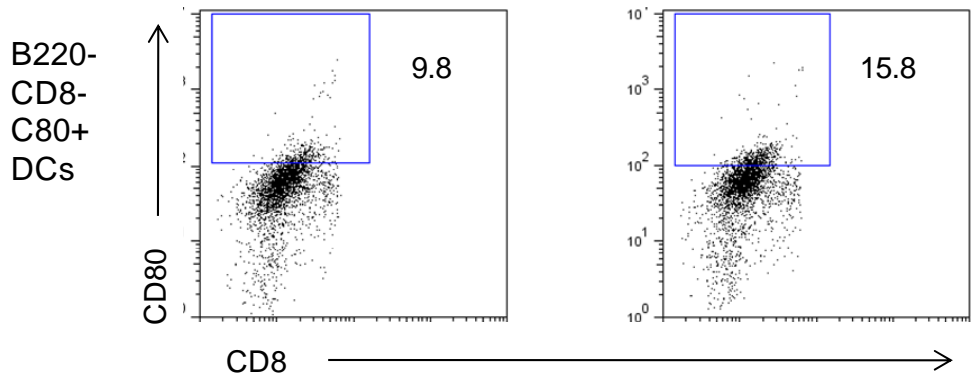

Supplement: pnas_0703610104_1.pdf [file pnas_0703610104_1.pdf]

**A**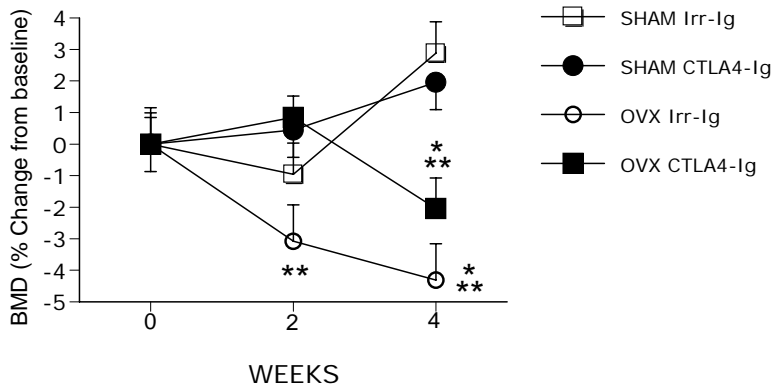**B**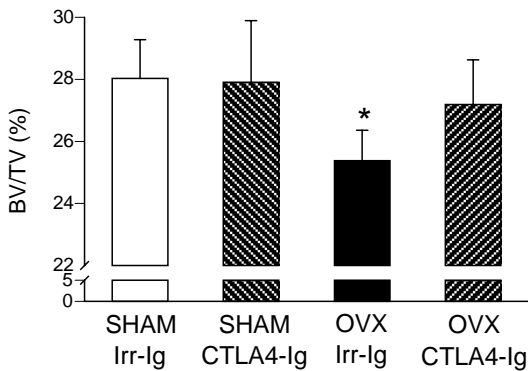**C**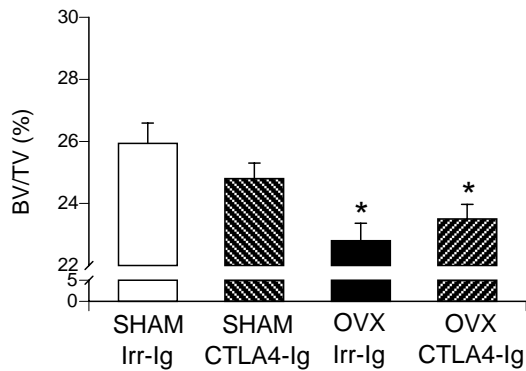**D**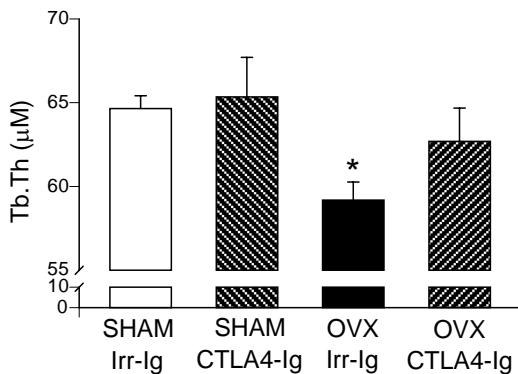**E**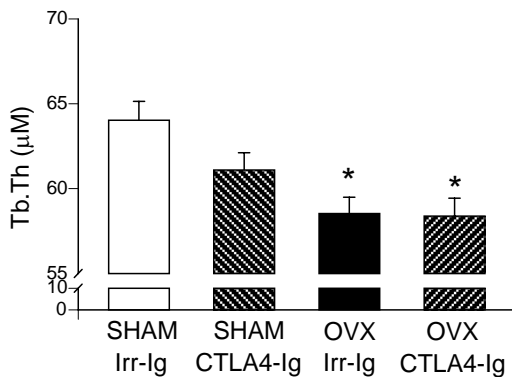**2 Weeks****4 Weeks**

Supplement: pnas_0703610104_3.pdf [file pnas_0703610104_3.pdf]
